# Supplementary material for: Exposure of children to BPA through dust and the association of urinary BPA and triclosan with oxidative stress in Guangzhou, China
Source: Royal Society of Chemistry journal article supplement (doi:10.1039/c6em00472e), 2016-01-01
Supplement: c6em00472e1.pdf [file c6em00472e1.pdf]

Supporting information:

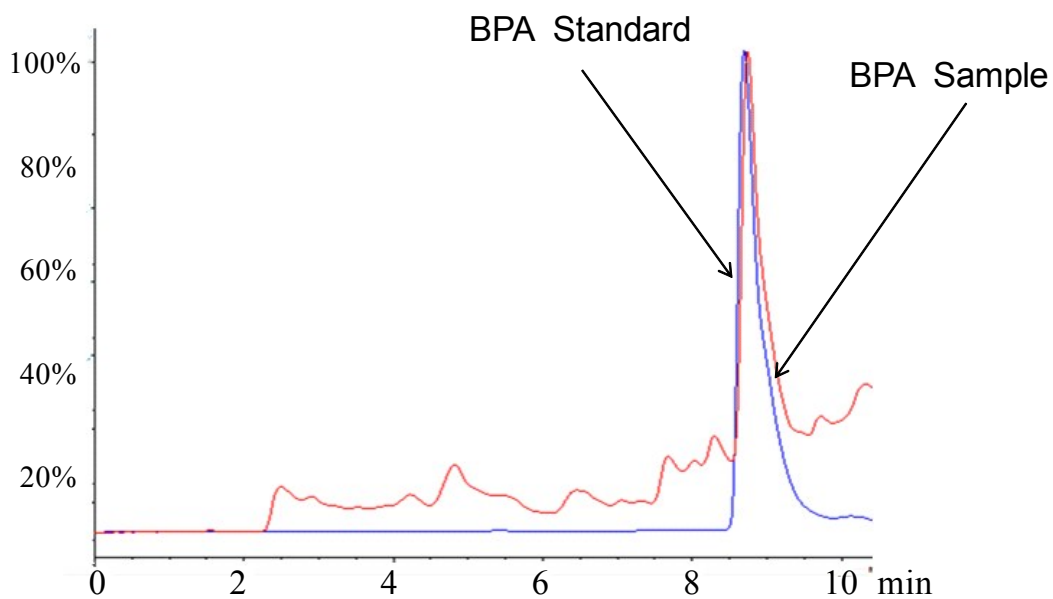

Fig 1: The chromatograms of BPA in dust sample

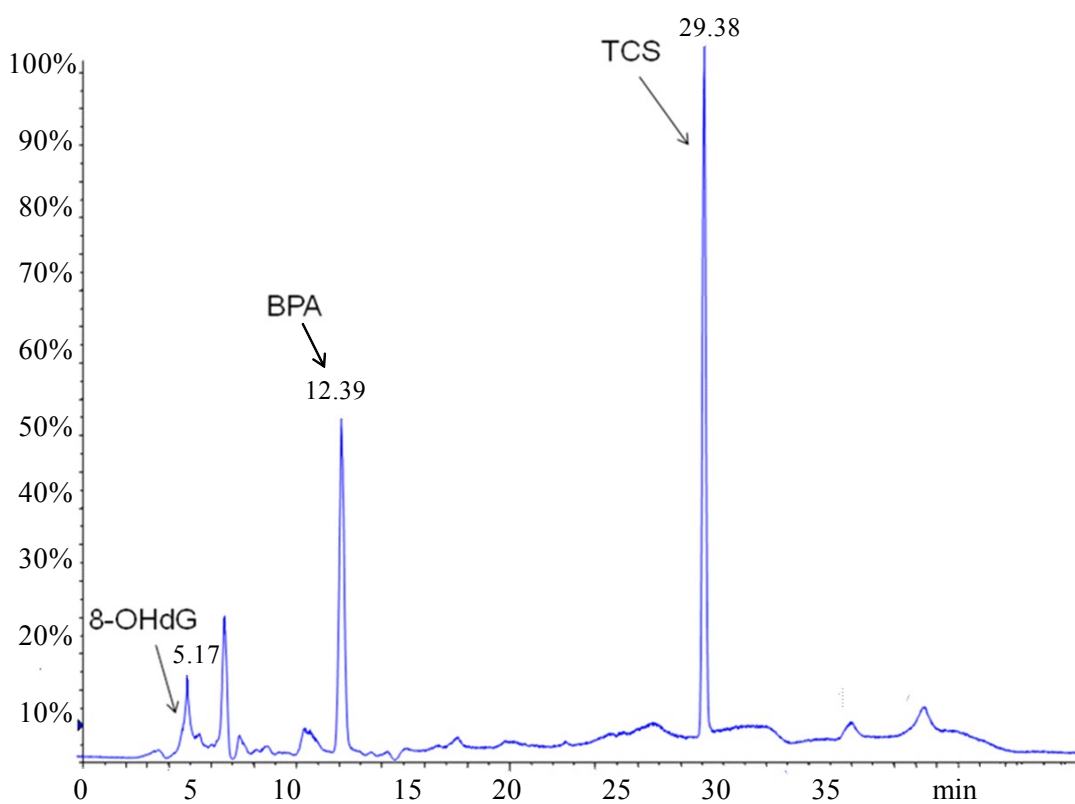

Fig 2: The chromatogram of urinary 8-OHdG, TCS and BPA in a real urine sample
